# Supplementary material for: Analysis of the influencing factors of team safety culture in non-public tertiary general hospitals
Source: Research Square preprint supplement (doi:10.21203/rs.3.rs-8581892/v1), 2026-01-21
Supplement: Supplementary file 1 [file 3d23de6ecb6a6c6ff1f3a194.docx]

Supplementary Material 1

Supplementary Table S1. A more detailed variable- and dimension-definition table

| **Dimension Classification** | **Dimension Name** | **Core Definition and Measurement Objective** | **Representative Item Example** | **Scoring and Instructions** |
| --- | --- | --- | --- | --- |
| **Department-level Dimensions** | Managerial Support for Patient Safety | To measure the degree of emphasis that department managers place on safety, whether they set an example by personal action, and whether they actively solicit employees' suggestions | My supervisor/manager praises staff when work is completed in accordance with patient safety protocols | 5-point Likert scale (1 = Strongly Disagree, 5 = Strongly Agree); some items are reverse-scored |
|  | Organizational Learning and Continuous Improvement | To measure whether the department learns from errors, proactively improves safety procedures, and evaluates the effectiveness of such improvements | Errors here have led to positive changes | Same as above |
|  | Intradepartmental Teamwork | To measure whether members within the department support and respect each other, and assist one another during busy periods | When one area is extremely busy, other colleagues offer help | Same as above |
|  | Openness of Communication | To measure whether healthcare staff feel free to speak up, question authority, or voice concerns about potential issues | Staff are free to speak up about things they observe that may negatively impact patient care | Same as above |
|  | Feedback and Communication Regarding Errors | To measure whether the department conducts constructive communication and feedback on error-related issues | — | Same as above |
|  | Non-punitive Response to Errors | To measure whether employees fear punishment, blame, or documentation in their personnel files for making mistakes | Staff feel that their mistakes will be used against them (reverse-scored item) | Same as above |
|  | Staffing | To measure whether staffing levels are adequate, working hours are excessively long, and whether the department relies too heavily on temporary staff | We have sufficient staff to handle the workload | Same as above |
| **Hospital-level Dimensions** | Hospital Management Support | To measure whether hospital management fosters a safety climate and prioritizes safety as a core objective | The work environment provided by hospital management promotes patient safety | Same as above |
|  | Interdepartmental Teamwork | To measure the level of cooperation and coordination between different departments to deliver optimal care | There is good collaboration between hospital departments that need to work together | Same as above |
|  | Handoffs and Transitions | To measure the efficiency and reliability of information transfer during patient transfers between departments or shift changes | When transferring patients from one department to another, no tasks "fall through the cracks" (reverse-scored item) | Same as above |
| **Outcome Variable** | Total Safety Culture Score | The core dependent variable of this study, used to assess healthcare staff's overall level of safety perception | Calculated by summing or averaging the scores of all items across dimensions | Continuous variable; higher scores indicate more positive perceptions of safety culture |
